# Supplementary material for: Temporal specification of blood progenitors from mouse embryonic stem cells and induced pluripotent stem cells
Source: Oxford University Press journal article supplement (doi:10.1242/dev.042119), 2010-07-22
Supplement: dev042119tables1.pdf [file dev042119tables1.pdf]

**Table S1. Mean fluorescence intensity (MFI) of d3.25 sorted populations**

| Population                            | T-EGFP MFI day 3 | Activin | T-EGFP MFI day 4 |
|---------------------------------------|------------------|---------|------------------|
| d3.25 T <sup>+</sup> F <sup>neg</sup> | 5579             | +       | 3329             |
|                                       |                  | -       | 2088             |
| d3.25 T <sup>+</sup> F <sup>pos</sup> | 4086             | +       | 1023             |
|                                       |                  | -       | 949              |

Flk1<sup>pos</sup> and Flk1<sup>neg</sup> cells from a d3.25 sort were reagggregated in either the absence or presence of activin A (3 ng/ml). The next day they were analyzed for the expression of T-EGFP by flow cytometry.
