# Supplementary material for: Temporal specification of blood progenitors from mouse embryonic stem cells and induced pluripotent stem cells
Source: Oxford University Press journal article supplement (doi:10.1242/dev.042119), 2010-07-22
Supplement: dev042119tables2.pdf [file dev042119tables2.pdf]

**Table S2. Primers used**

| Gene         | Primer | Sequence (5' to 3')        |
|--------------|--------|----------------------------|
| <i>Cdx4</i>  | F      | TCCATCTGCTGTCCGTGGATTCA    |
|              | R      | ATGCTTCCGTTTCTCTGCTCCTGT   |
| <i>Foxa2</i> | F      | TGAGTGGAGACTTTGGGAGAGCTT   |
|              | R      | ATGACAGATCACTGTGGCCCATCT   |
| <i>Sox1</i>  | F      | ACAAGGCCAAGGATAGGGACAACA   |
|              | R      | CTGGGTCAGGATTGCTTCCTTGAA   |
| <i>Sox17</i> | F      | AGCTCCAGAACTGCAGACCAGAA    |
|              | R      | TCCATGAGGTGACATGCTGAGGTT   |
| <i>Actb</i>  | F      | TGAGCGCAAGTACTCTGTGTGGAT   |
|              | R      | ACTCATCGTACTCCTGCTTGCTGA   |
| <i>Hoxb4</i> | F      | TTCACTACAATCGCTACCTGACGC   |
|              | R      | GGTGTGGGCAACTTGTTGGTCTTT   |
| <i>Lmo2</i>  | F      | GCATGCACTGTGCCATCCTGATA    |
|              | R      | ACAGGGTAGTTACCAAAGCCAGGA   |
| <i>Runx1</i> | F      | ACGGTTCAGATGTGCATCGTG      |
|              | R      | TCAGAACCAGCGTTAGGCTT       |
| <i>Scl</i>   | F      | CAGCCTGATGCTAAGGCAAG       |
|              | R      | AGCCAACCTACCATGCACAC       |
| <i>Gata3</i> | F      | ATTAAATAGCTTCTATGCGCCCGGCG |
|              | R      | ATGCATGTTGGTAGCTGGTACGCT   |
| <i>T</i>     | F      | TGTCCTCCCTTGTTCCTTAGAGT    |
|              | R      | AGTAGGCATGTTCCAAGGGCAGAA   |
| <i>Tcrb</i>  | F      | GTAGGCACCTGTGGGGAAGAAACT   |
|              | R      | TGAGAGCTGTGTCCTACTATCGATT  |

qPCR primers were designed using the PrimerQuest Tool at the IDT website (idtdna.com), except for the mouse *Tcrb* locus (Rodewald et al., 1994).

F, forward; R, reverse.

**Rodewald, H. R., Kretzschmar, K., Takeda, S., Hohl, C. and Dessing, M. (1994).**

Identification of pro-thymocytes in murine fetal blood: T lineage commitment can precede thymus colonization. *EMBO J.* **13**, 4229-4240.
