# Supplementary figures and images for: Temporal specification of blood progenitors from mouse embryonic stem cells and induced pluripotent stem cells
Source: Oxford University Press journal article supplement (doi:10.1242/dev.042119), 2010-07-22

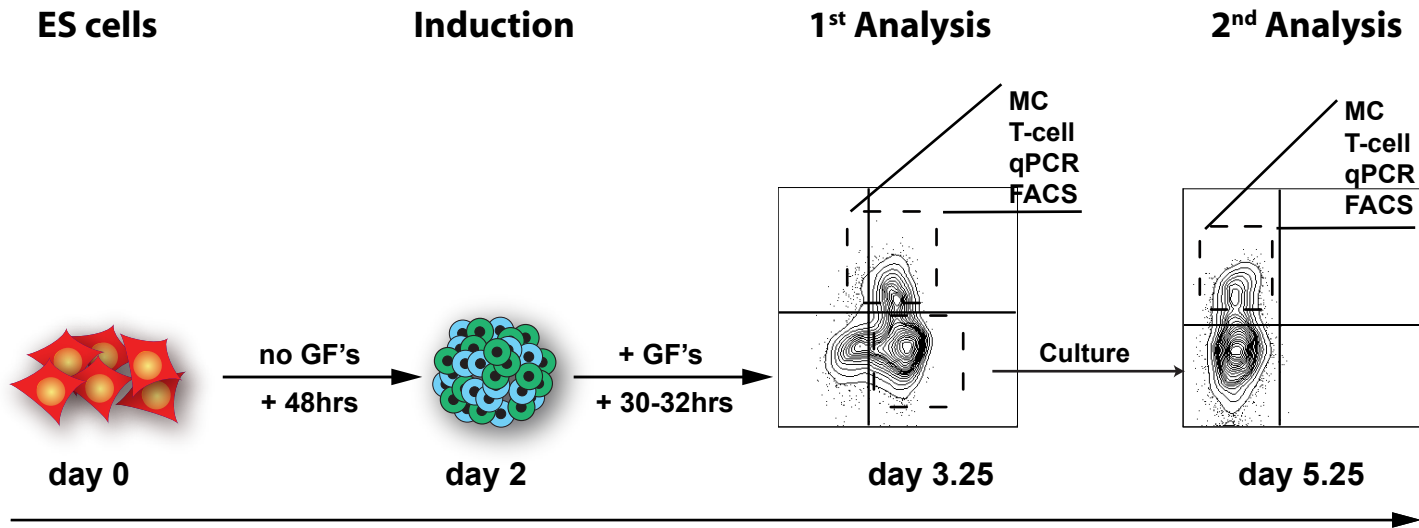

Supplement: dev042119figs1.pdf [file dev042119figs1.pdf]

A

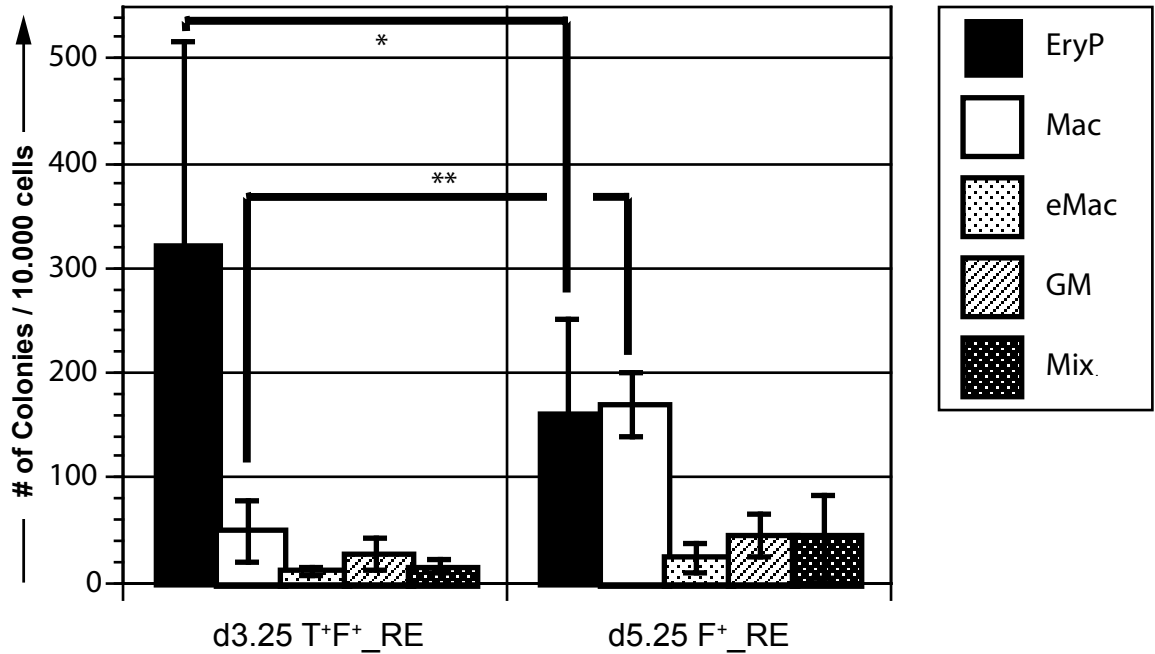

Supplement: dev042119figs2.pdf [file dev042119figs2.pdf]

**A****d3.25 T<sup>+</sup>F<sup>+</sup>**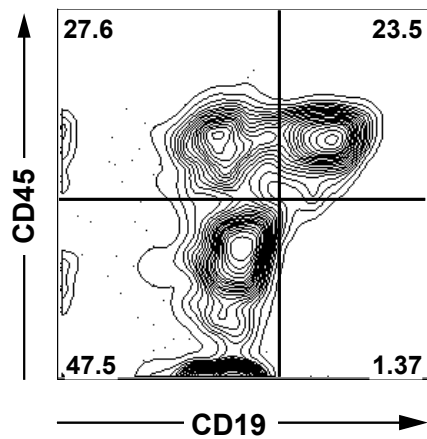**B**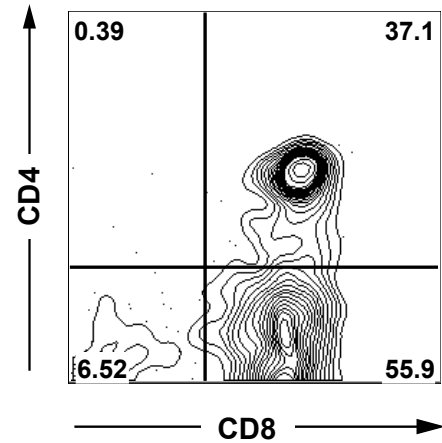**d5.25 F<sup>+</sup>**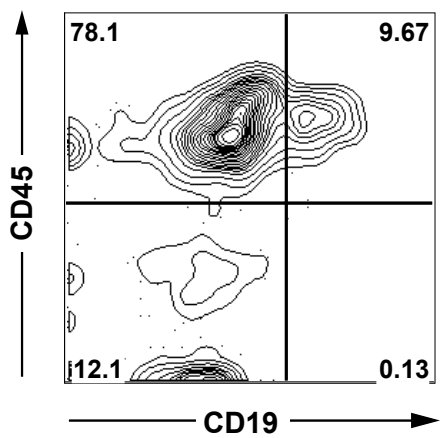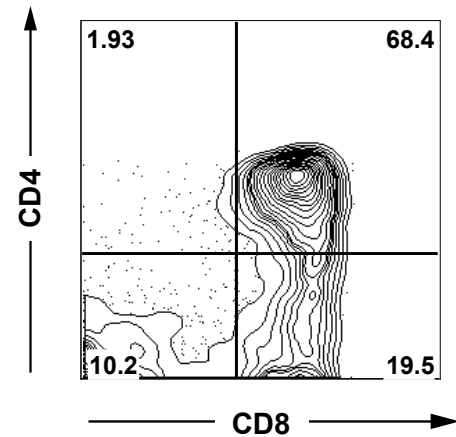

Supplement: dev042119figs3.pdf [file dev042119figs3.pdf]

A

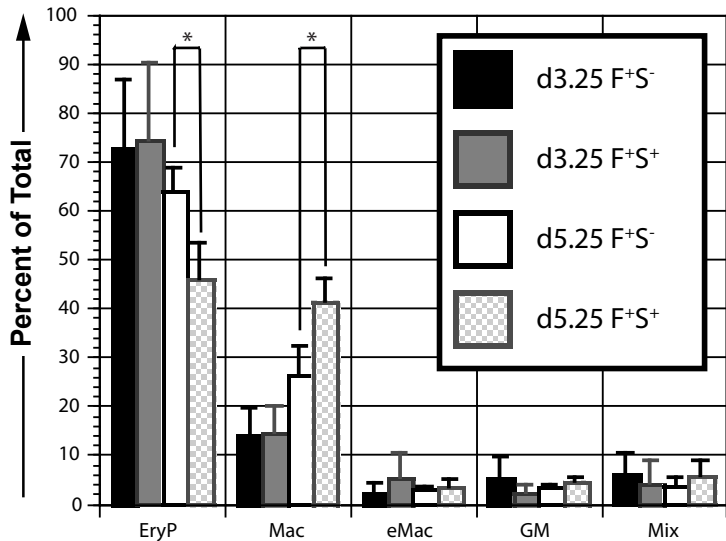

Supplement: dev042119figs4.pdf [file dev042119figs4.pdf]

A

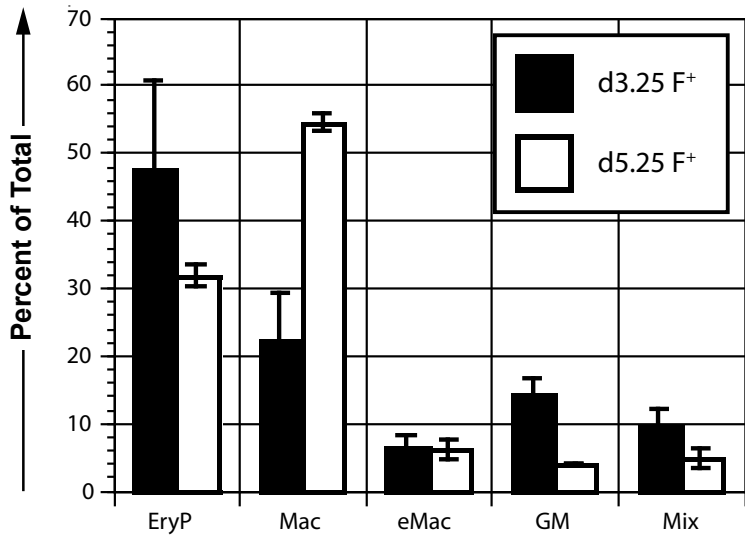

Supplement: dev042119figs5.pdf [file dev042119figs5.pdf]
